# Supplementary material for: A nucleotide binding–independent role for γ-tubulin in microtubule capping and cell division
Source: PubMed Central journal article supplement (PMC9930161; doi:10.1083/jcb.202204102), 2023-01-25

Supplementary Figure 2A

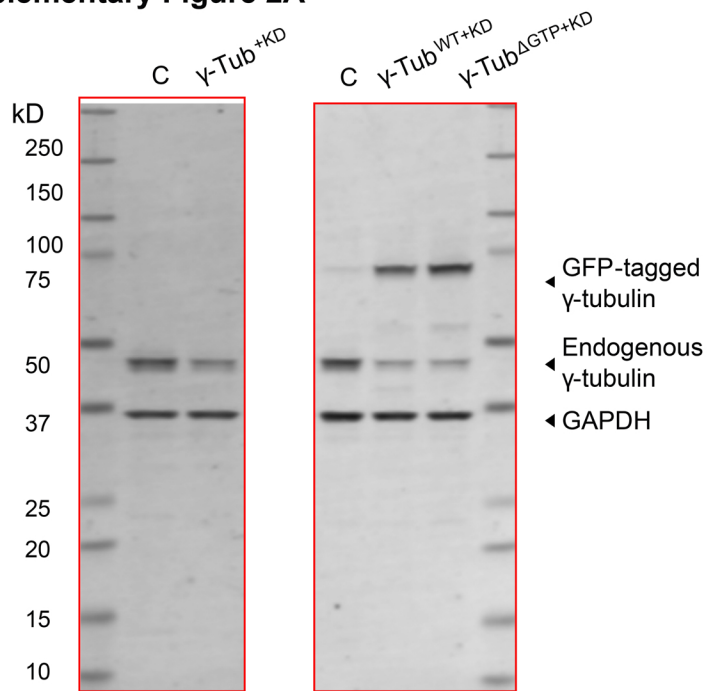

Supplementary Figure 2G

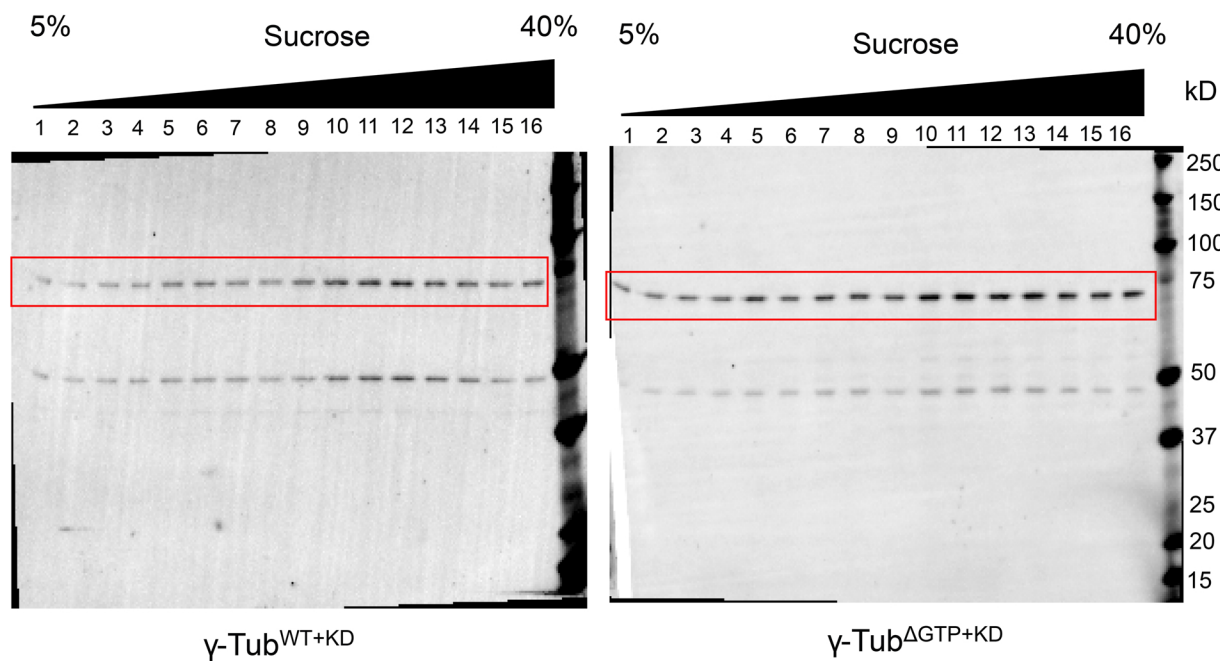

Supplement: JCB_202204102_SourceDataFS2.pdf [file JCB_202204102_SourceDataFS2.pdf]
